# Supplementary material for: Photoelectrochemical analysis of the alkaline phosphatase activity in single living cells
Source: Royal Society of Chemistry journal article supplement (doi:10.1039/d1an01273h), 2021-01-01

## Supporting Information for

Photoelectrochemical Analysis of Alkaline Phosphatase Activity in Single Living Cells

Nina Wang<sup>a</sup>, Rongrong Pan<sup>a</sup>, Lina Ji<sup>b\*</sup>, Dechen Jiang<sup>a\*</sup>, Hong-Yuan Chen<sup>a</sup>

- a State Key Laboratory of Analytical Chemistry for Life Science, School of Chemistry and Chemical Engineering, Nanjing University, Nanjing, 210092, China
- b State Key Laboratory of Pharmaceutical Biotechnology, School of Life Sciences, Nanjing University, Nanjing, 210092, China

Email: dechenjiang@nju.edu.cn (D.J); jilina@nju.edu.cn (L.J)

Fig. S1 The TEM image of the prepared CdS QDs.

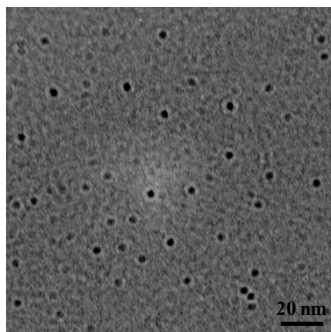

Fig. S2 UV-vis adsorption of the prepared CdS QDs.

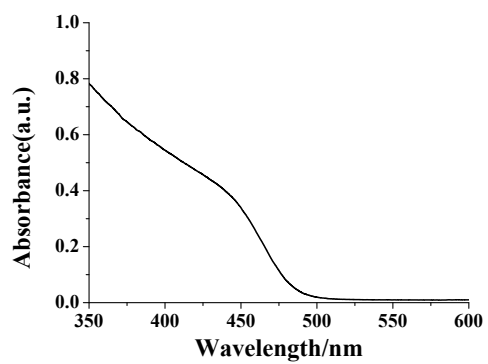

Fig. S3 The SEM images of the orifice of the nano-capillary before the sputtering of ITO layer.

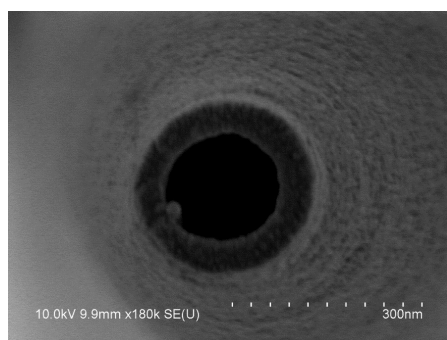

Supplement: d1an01273h1.pdf [file d1an01273h1.pdf]
